# Supplementary material for: Substitution of Usual Perioperative Care by eHealth to Enhance Postoperative Recovery in Patients Undergoing General Surgical or Gynecological Procedures: Study Protocol of a Randomized Controlled Trial
Source: PubMed Central journal article supplement (PMC5215129; doi:10.2196/resprot.6580), 2016-12-21
Supplement: resprot_v5i4e245_app2.pdf [file resprot_v5i4e245_app2.pdf]

## Appendix 2 – Selection of the PROMIS physical function item bank v.1.2

| Question                                                                                                      | Answering options                                                                                                            |
|---------------------------------------------------------------------------------------------------------------|------------------------------------------------------------------------------------------------------------------------------|
| PFB42 Are you able to stand unsupported for 30 minutes?                                                       | 5 Without any difficulty<br>4 With a little difficulty<br>3 With some difficulty<br>2 With much difficulty<br>1 Unable to do |
| PFA10 Are you able to stand for one hour?                                                                     | 5 Without any difficulty<br>4 With a little difficulty<br>3 With some difficulty<br>2 With much difficulty<br>1 Unable to do |
| PFB49 Does your health now limit you in going for a short walk (less than 15 minutes)?                        | 5 Not at all<br>4 Very little<br>3 Somewhat<br>2 Quite a lot<br>1 Cannot do                                                  |
| PFA23 Are you able to go for a walk of at least 15 minutes?                                                   | 5 Without any difficulty<br>4 With a little difficulty<br>3 With some difficulty<br>2 With much difficulty<br>1 Unable to do |
| PFB5r1 Does your health now limit you in hiking a couple of miles (3 km) on uneven surfaces, including hills? | 5 Not at all<br>4 Very little<br>3 Somewhat<br>2 Quite a lot<br>1 Cannot do                                                  |
| PFB24 Are you able to run a short distance, such as to catch a bus?                                           | 5 Without any difficulty<br>4 With a little difficulty<br>3 With some difficulty<br>2 With much difficulty<br>1 Unable to do |
| PFB13 Are you able to carry a shopping bag or briefcase?.                                                     | 5 Without any difficulty<br>4 With a little difficulty<br>3 With some difficulty<br>2 With much difficulty<br>1 Unable to do |
| PFA14r1 Are you able to carry a heavy object (over 10 pounds/5 kg)?                                           | 5 Without any difficulty<br>4 With a little difficulty<br>3 With some difficulty<br>2 With much difficulty<br>1 Unable to do |
| PFB39r1 Are you able to reach and get down a 5 pound (2 kg) object from above your head?                      | 5 Without any difficulty<br>4 With a little difficulty<br>3 With some difficulty<br>2 With much difficulty<br>1 Unable to do |
| PFC10 Does your health now limit you in climbing one flight of stairs?                                        | 5 Not at all<br>4 Very little<br>3 Somewhat<br>2 Quite a lot<br>1 Cannot do                                                  |
| PFC10 Does your health now limit you in climbing several flights of stairs?                                   | 5 Not at all<br>4 Very little<br>3 Somewhat<br>2 Quite a lot                                                                 |

|                                                                                                                                       |                                                                                                                              |
|---------------------------------------------------------------------------------------------------------------------------------------|------------------------------------------------------------------------------------------------------------------------------|
|                                                                                                                                       | 1 Cannot do                                                                                                                  |
| PFA3 Does your health now limit you in bending, kneeling, or stooping?                                                                | 5 Not at all<br>4 Very little<br>3 Somewhat<br>2 Quite a lot<br>1 Cannot do                                                  |
| PFB43 Does your health now limit you in taking care of your personal needs (dress, comb hair, toilet, eat, bathe)?                    | 5 Not at all<br>4 Very little<br>3 Somewhat<br>2 Quite a lot<br>1 Cannot do                                                  |
| PFA53 Are you able to run errands and shop?                                                                                           | 5 Without any difficulty<br>4 With a little difficulty<br>3 With some difficulty<br>2 With much difficulty<br>1 Unable to do |
| PFB11 Are you able to wash dishes, pots, and utensils by hand while standing at a sink?                                               | 5 Without any difficulty<br>4 With a little difficulty<br>3 With some difficulty<br>2 With much difficulty<br>1 Unable to do |
| PFA42 Are you able to carry a laundry basket up a flight of stairs?                                                                   | 5 Without any difficulty<br>4 With a little difficulty<br>3 With some difficulty<br>2 With much difficulty<br>1 Unable to do |
| PFB12 Are you able to make a bed, including spreading and tucking in bed sheets?                                                      | 5 Without any difficulty<br>4 With a little difficulty<br>3 With some difficulty<br>2 With much difficulty<br>1 Unable to do |
| PFB3 Does your health now limit you in putting a trash bag outside?                                                                   | 5 Not at all<br>4 Very little<br>3 Somewhat<br>2 Quite a lot<br>1 Cannot do                                                  |
| PFB1 Does your health now limit you in doing moderate work around the house like vacuuming, sweeping floors or carrying in groceries? | 5 Not at all<br>4 Very little<br>3 Somewhat<br>2 Quite a lot<br>1 Cannot do                                                  |
| PFA25 Are you able to do yard work like raking leaves, weeding, or pushing a lawn mower?                                              | 5 Without any difficulty<br>4 With a little difficulty<br>3 With some difficulty<br>2 With much difficulty<br>1 Unable to do |
| PFA4 Does your health now limit you in doing heavy work around the house like scrubbing floors, or lifting or moving heavy furniture? | 5 Not at all<br>4 Very little<br>3 Somewhat<br>2 Quite a lot<br>1 Cannot do                                                  |
| PFA33 Are you able to exercise hard for half an hour?                                                                                 | 5 Without any difficulty<br>4 With a little difficulty<br>3 With some difficulty<br>2 With much difficulty<br>1 Unable to do |

|                                                                                                                                      |                                                                                                                              |
|--------------------------------------------------------------------------------------------------------------------------------------|------------------------------------------------------------------------------------------------------------------------------|
| PFA13 Are you able to exercise for an hour?                                                                                          | 5 Without any difficulty<br>4 With a little difficulty<br>3 With some difficulty<br>2 With much difficulty<br>1 Unable to do |
| PFA19r1 Are you able to run or jog for two miles (3km)?                                                                              | 5 Without any difficulty<br>4 With a little difficulty<br>3 With some difficulty<br>2 With much difficulty<br>1 Unable to do |
| PFC7r1 Are you able to run five miles (8 km)?                                                                                        | 5 Without any difficulty<br>4 With a little difficulty<br>3 With some difficulty<br>2 With much difficulty<br>1 Unable to do |
| PFC33r1 Are you able to run ten miles (16 km)?                                                                                       | 5 Without any difficulty<br>4 With a little difficulty<br>3 With some difficulty<br>2 With much difficulty<br>1 Unable to do |
| PFB7 Does your health now limit you in doing strenuous activities such as backpacking, skiing, playing tennis, bicycling or jogging? | 5 Not at all<br>4 Very little<br>3 Somewhat<br>2 Quite a lot<br>1 Cannot do                                                  |
| PFC12 Does your health now limit you in doing two hours of physical labor?                                                           | 5 Not at all<br>4 Very little<br>3 Somewhat<br>2 Quite a lot<br>1 Cannot do                                                  |
| PFC35 Does your health now limit you in doing eight hours of physical labor?                                                         | 5 Not at all<br>4 Very little<br>3 Somewhat<br>2 Quite a lot<br>1 Cannot do                                                  |
